# Supplementary material
Source: Springer Nature journal article supplement (https://www.springermedizin.de/resource/supplementary/12990_2008_189_MOESM3_ESM.pdf/9612868)

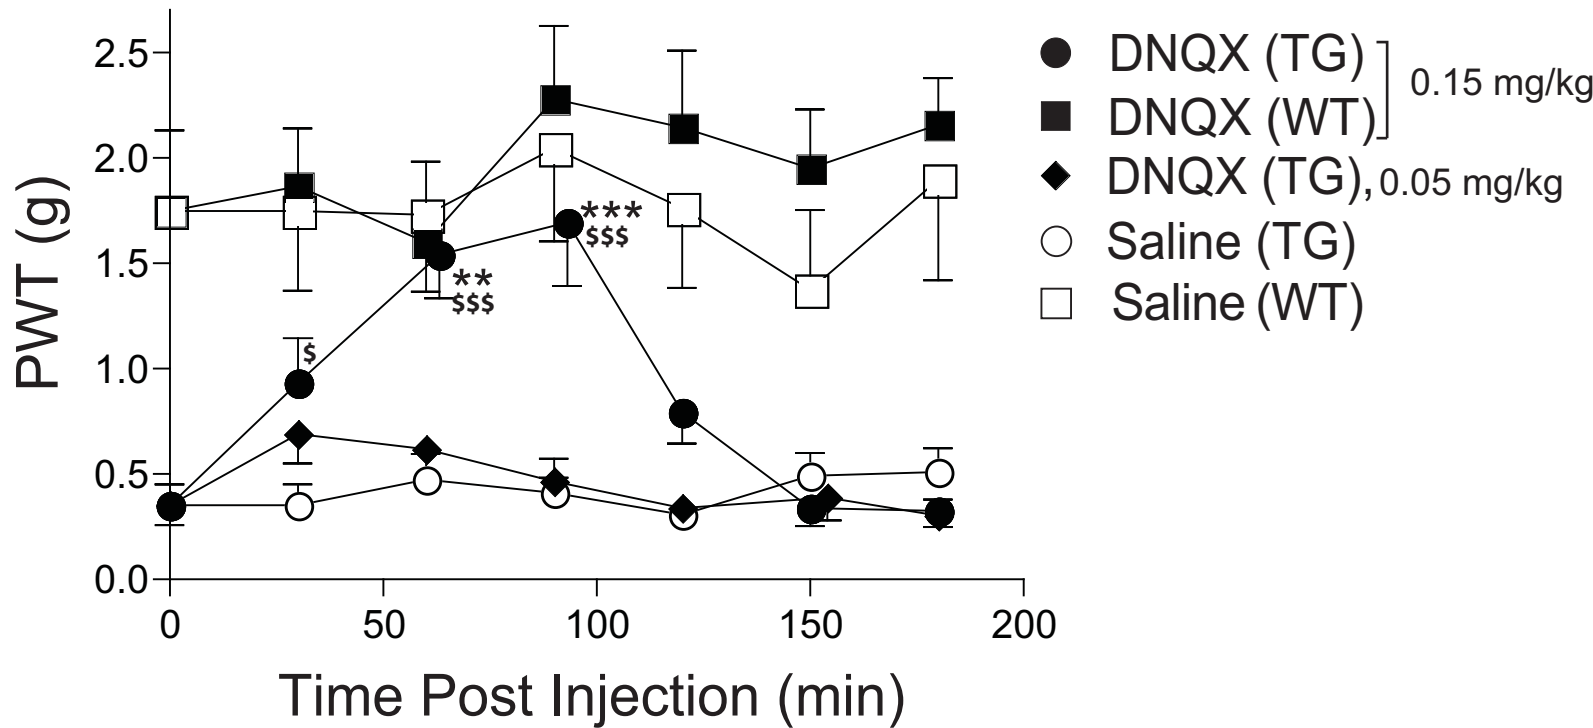

Supplement: MOESM3 [file 9612868]
